# Supplementary material for: Conserved Sequences in the 5′ and 3′ Untranslated Regions of Jingmenvirus Group Representatives
Source: MDPI journal article supplement (doi:10.3390/v15040971), 2023-04-15
Supplement: s1 [file s1]

Table S1. Oligonucleotides used for virus amount estimation of ALSV and YGTV

| Virus | Primer         | Sequence                   |
|-------|----------------|----------------------------|
| ALSV  | Miass_gly_3F   | 5' TGGATCAGCTCACACCACAC 3' |
|       | Miass_gly_3R   | 5' TCACCGTCACAGTGGAATGG 3' |
| YGTV  | Yanggou_gly_1F | 5' ACTACTGGTTGCCGTCCTCG 3' |
|       | Yanggou_gly_1R | 5' ACTACTGGTTGCCGTCCTCG 3' |

Table S2. Oligonucleotides used for RACE PCR

| Primer              | Sequence                       | Direction | Virus     | segment |
|---------------------|--------------------------------|-----------|-----------|---------|
| Miass_NS5_RACE      | 5' GCCAACACTATCAGGACAATCATG 3' | Reverse   | Alongshan | 1       |
| Alongshan_seg2_492r | 5' TCCGTTTGGTTGTGCCGAT 3'      | Reverse   | Alongshan | 2       |
| Miass_NS3_RACE      | 5' CAATGCCATGATCGCTAGTCC 3'    | Reverse   | Alongshan | 3       |
| Miass_C_RACE        | 5' GTCCCAGCAGCTCGATCT 3'       | Reverse   | Alongshan | 4       |
| Miass_NS5_3F        | 5' AGGCCATGAATGCAACAGGA 3'     | Forward   | Alongshan | 1       |
| Miass_gly_1F        | 5' CCACATCACGGGAGGTATCG 3'     | Forward   | Alongshan | 2       |
| Miass_NS3_1F        | 5' AGGAGAGGGCCATCAGGAAT 3'     | Forward   | Alongshan | 3       |
| Miass_C_2F          | 5' CACGGGAGAAACGGATAGGG 3'     | Forward   | Alongshan | 4       |
| Yanggou_seg1_612r   | 5' TCTGCCATCCATTCTTCCT 3'      | Reverse   | Yanggou   | 1       |
| Yanggou_gly_1R      | 5' GTCGCTGCAGTCAAATATCT 3'     | Reverse   | Yanggou   | 2       |
| Yanggou_seg3_772r   | 5' CGTACCTTCTGTCCTCTATCCA 3'   | Reverse   | Yanggou   | 3       |
| Yanggou_seg4_1R     | 5' CATTCTTCGGATGTCGGCCT 3'     | Reverse   | Yanggou   | 4       |
| Yanggou_seg1_3F     | 5' ATTGCAGGATGGGACACCAA 3'     | Forward   | Yanggou   | 1       |
| Yanggou_seg2_4F     | 5' GGATGGGGTGGTCAGAGTC 3'      | Forward   | Yanggou   | 2       |
| Yanggou_seg3_3F     | 5' GCGTTGTCACCACCTCGATA 3'     | Forward   | Yanggou   | 3       |
| Yanggou_seg4_3F     | 5' CTGGTGGCATCACTGGATGT 3'     | Forward   | Yanggou   | 4       |

Table S3. Positive clone ratios for Alongshan and Yanggou viruses

| Virus                     | Segment | Bacterial clones taken |       |
|---------------------------|---------|------------------------|-------|
|                           |         | with intact 3'UTR      | total |
| YGTV strain Bredy15-22181 | 3       | 4                      | 7     |
| YGTV strain Bredy15-22188 | 2       | 2                      | 4     |
|                           | 3       | 2                      | 2     |
| YGTV strain Bredy15-22189 | 2       | 2                      | 3     |
|                           | 3       | 7                      | 10    |
| YGTV Plast15-22438        | 3       | 2                      | 5     |
| ALSV Miass502             | 1       | 0                      | 16    |

Table S4. Oligonucleotides used for Sanger sequencing PCR products obtained after RACE.

| Primer              | Sequence                       | Direction | Virus     | segment |
|---------------------|--------------------------------|-----------|-----------|---------|
| Miass_NS5_RACE      | 5' GCCAACACTATCAGGACAATCATG 3' | Reverse   | Alongshan | 1       |
| Alongshan_seg2_492r | 5' TCCGTTTGGTTGTGCCGAT 3'      | Reverse   | Alongshan | 2       |
| Miass_NS3_RACE      | 5' CAATGCCATGATCGCTAGTCC 3'    | Reverse   | Alongshan | 3       |
| Miass_C_RACE        | 5' GTCCCAGCAGCTCGATCT 3'       | Reverse   | Alongshan | 4       |
| Miass_NS5_3'RACE    | 5' AAAGCCAGCATGTCACTTGG 3'     | Forward   | Alongshan | 1       |
| Miass_Gly_3'RACE    | 5' TCTTCCGAGCTAACATCCCC 3'     | Forward   | Alongshan | 2       |
| Miass_NS3_1F        | 5' AGGAGAGGGCCATCAGGAAT 3'     | Forward   | Alongshan | 3       |
| Miass_C_3'RACE      | 5' CCAGTGTCTTGGCATTCTCG 3'     | Forward   | Alongshan | 4       |
| Yanggou_seg1_469r   | 5' TGAGATCCATCAGCACTCTG 3'     | Reverse   | Yanggou   | 1       |
| Yanggou_seg2_350r   | 5' GAGGACGGCAACCAGTAGT 3'      | Reverse   | Yanggou   | 2       |
| Yanggou_seg3_535r   | 5' AGCTGATGGGCTGTAGATAAC 3'    | Reverse   | Yanggou   | 3       |
| Yanggou_seg4_395r   | 5' CCACGGCTCTTGTCCAC 3'        | Reverse   | Yanggou   | 4       |
| Yanggou_seg1_2495f  | 5' TATAGGGATGACTCAACTCAGGA 3'  | Forward   | Yanggou   | 1       |
| Yanggou_seg2_2182F  | 5' CATTGAAGAACTACTATTTGTAC 3'  | Forward   | Yanggou   | 2       |
| Yanggou_seg3_2348F  | 5' AGAGGACGAGGCAGAACAG 3'      | Forward   | Yanggou   | 3       |
| Yanggou_seg4_2293F  | 5' CTCAGCATGTATAGTGATGGT 3'    | Forward   | Yanggou   | 4       |

Table S5. Oligonucleotides used for Sanger sequencing PCR products after cloning in pCR2.1 vector

| Primer           | Sequence                     | Designed by        |
|------------------|------------------------------|--------------------|
| M13 (-21) Primer | 5'-TGTAACGACGGCCAGT-3'       | Applied Biosystems |
| M13_long_F       | 5'-ACAGGAAACAGCTATGACCATG-3' | custom             |

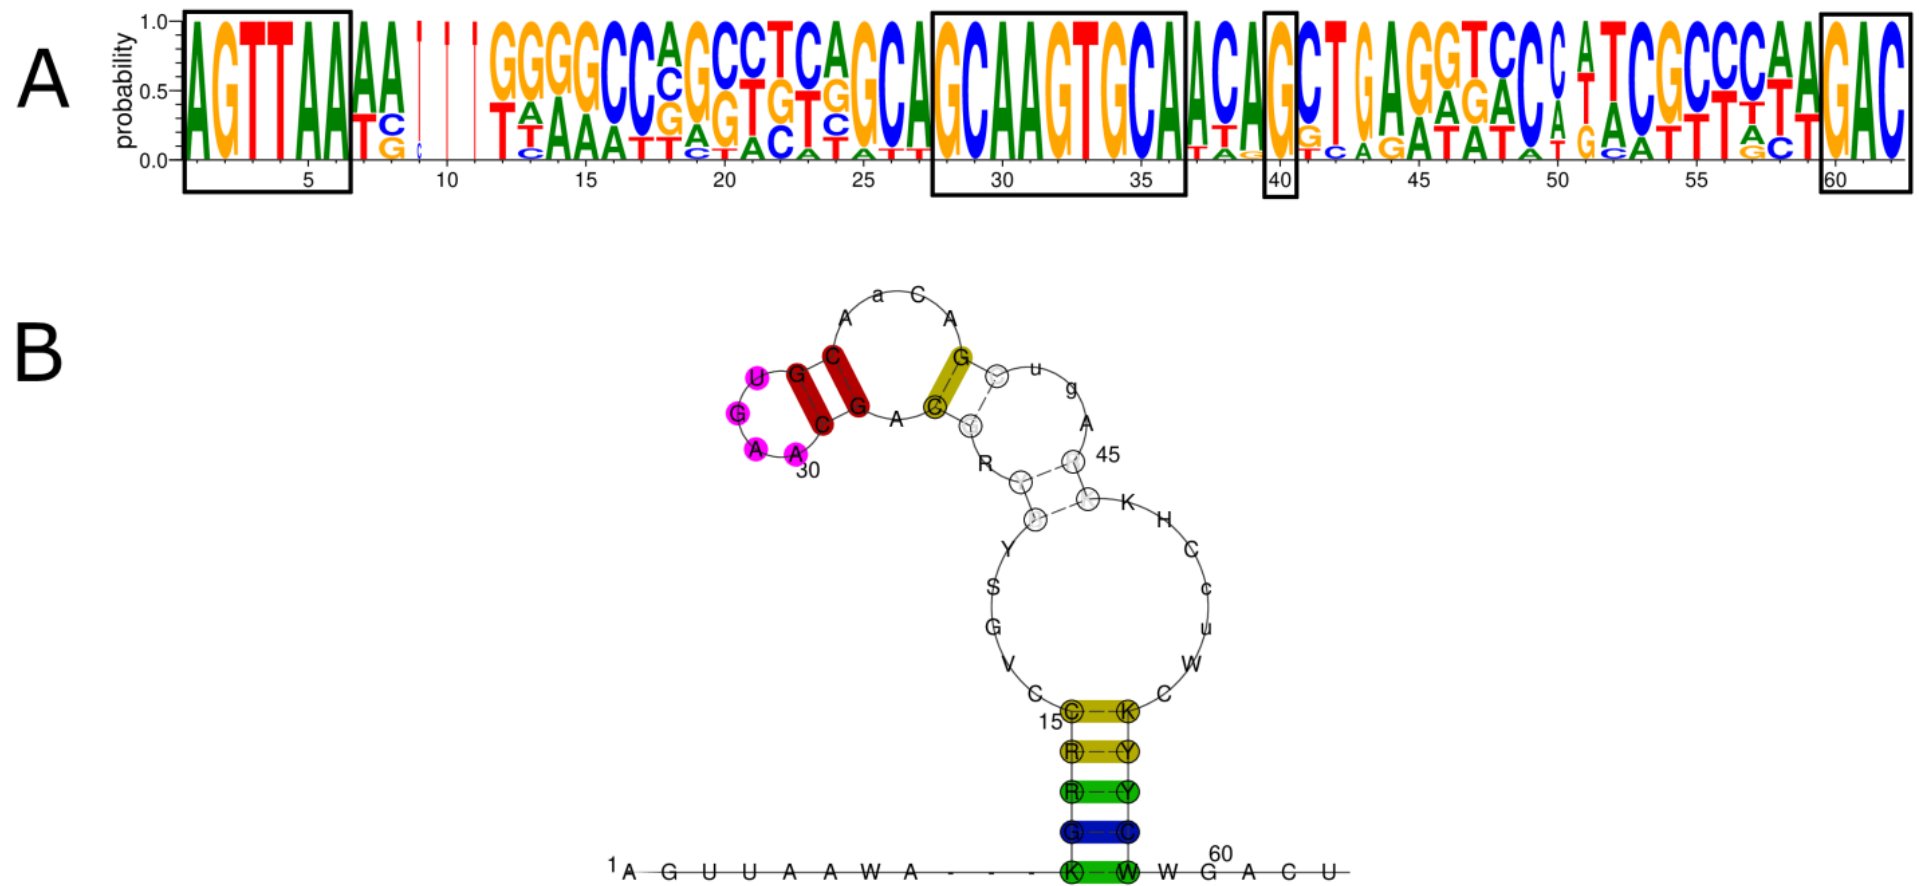

Figure S1. Consensus sequences of the ALSV and YGTV 5'UTRs (A) according to ClustalW alignment and structures predicted with RNAalifold (B) based on the consensus sequences

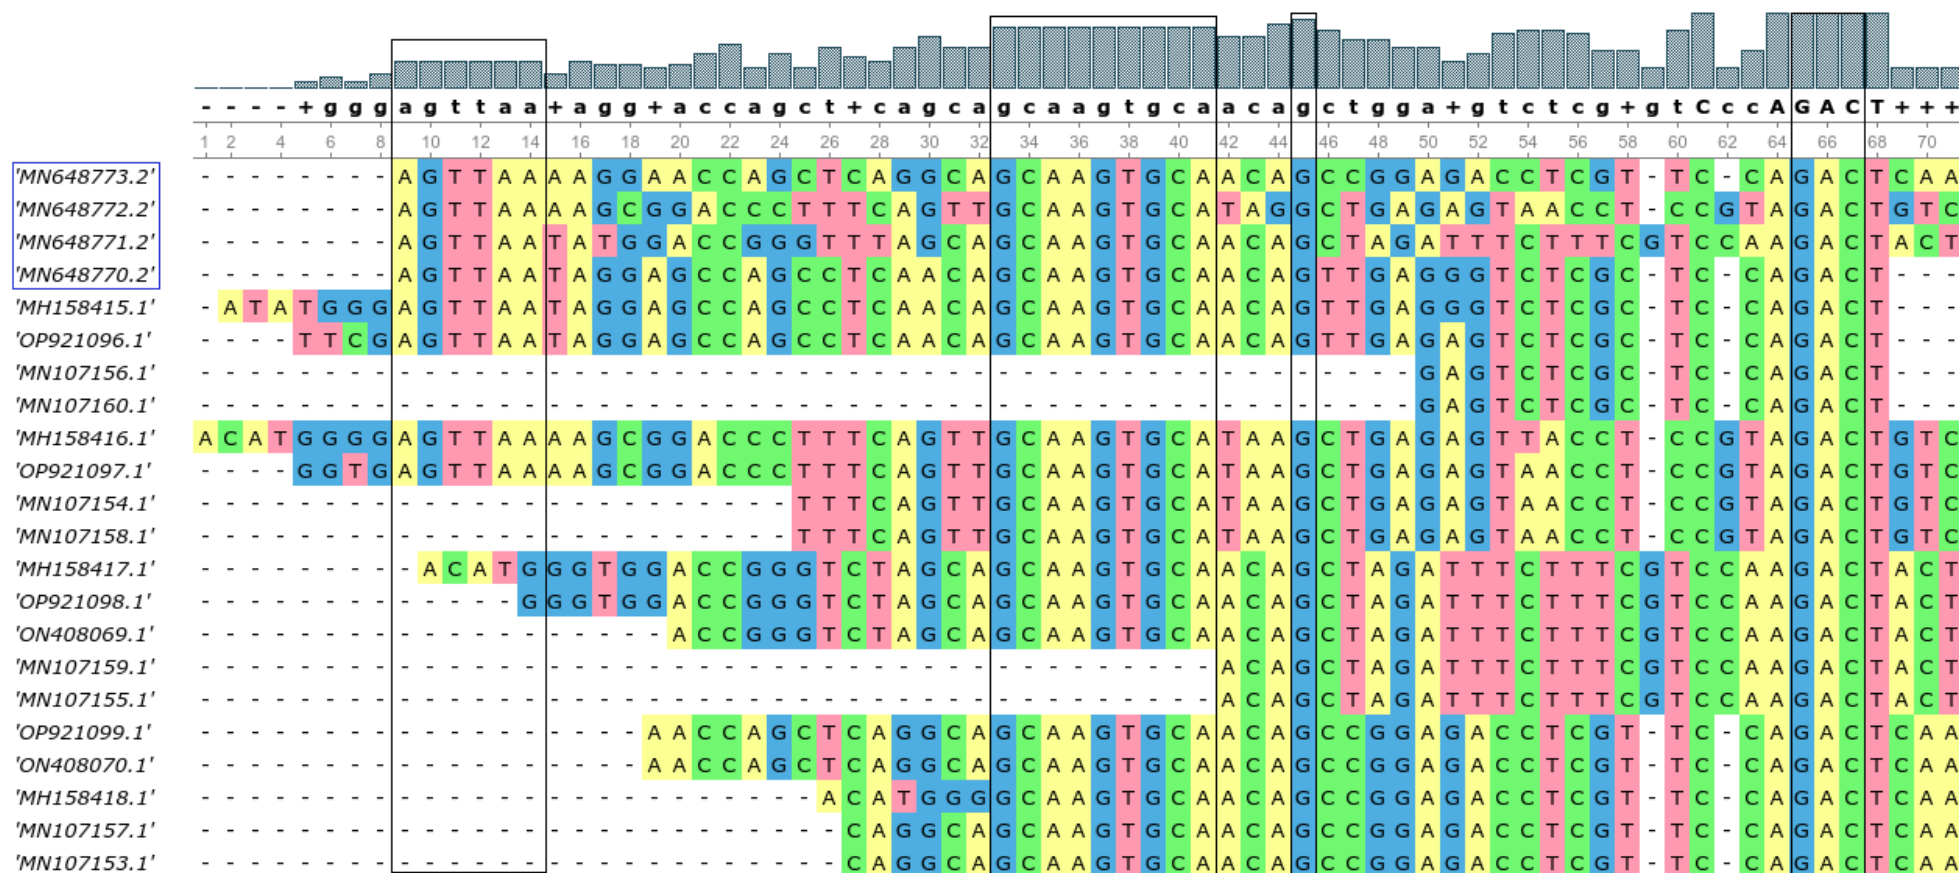

Figure S2. Conserved sequences in the 5'UTRs of ALSV genomes found in GenBank according to ClustalW alignment. Regions discussed in the article are in black boxes. Sequences used as references during alignment construction are marked by blue boxes

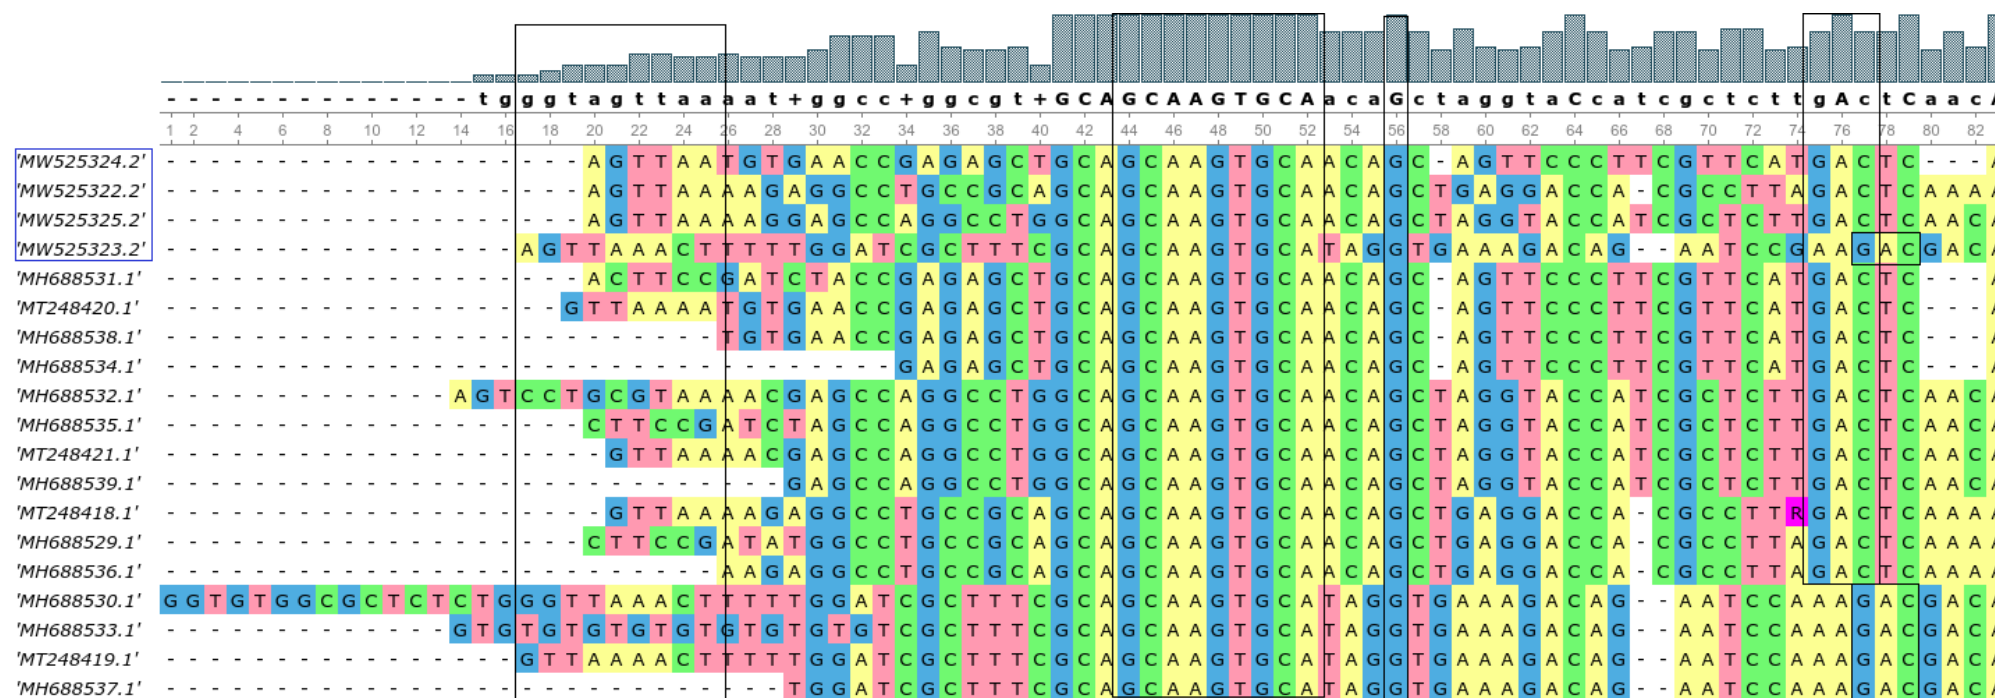

Figure S3. Conserved sequences in the 5'UTRs of YGTV genomes found in GenBank according to ClustalW alignment. Regions discussed in the article are in black boxes. Sequences used as references during alignment construction are marked by blue boxes

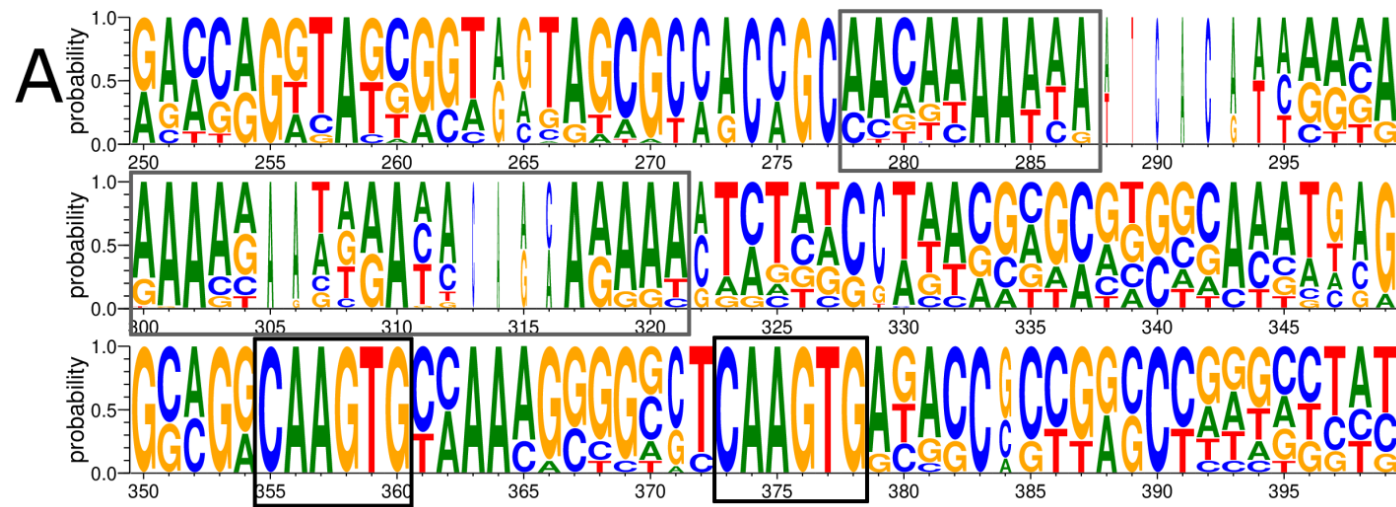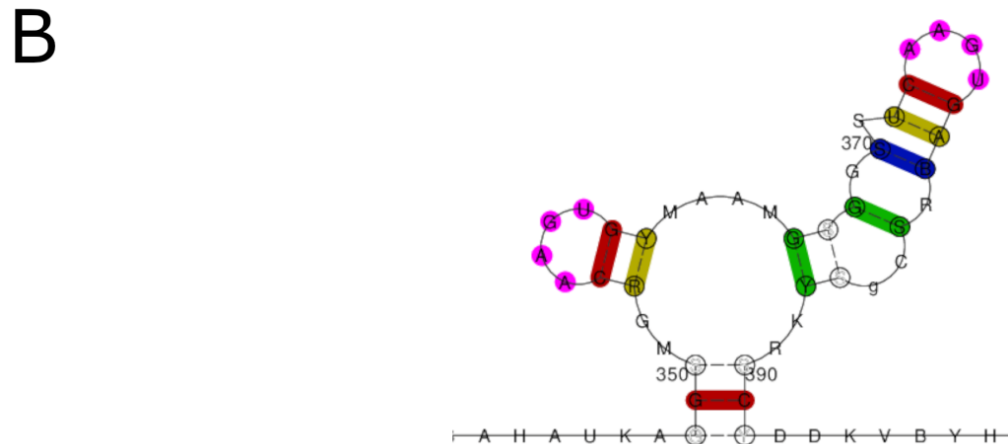

Figure S4. Consensus sequences of ALSV and YGTV 3'UTRs (A) according to ClustalW alignment and structures predicted by RNAalifold (B) based on the consensus sequences

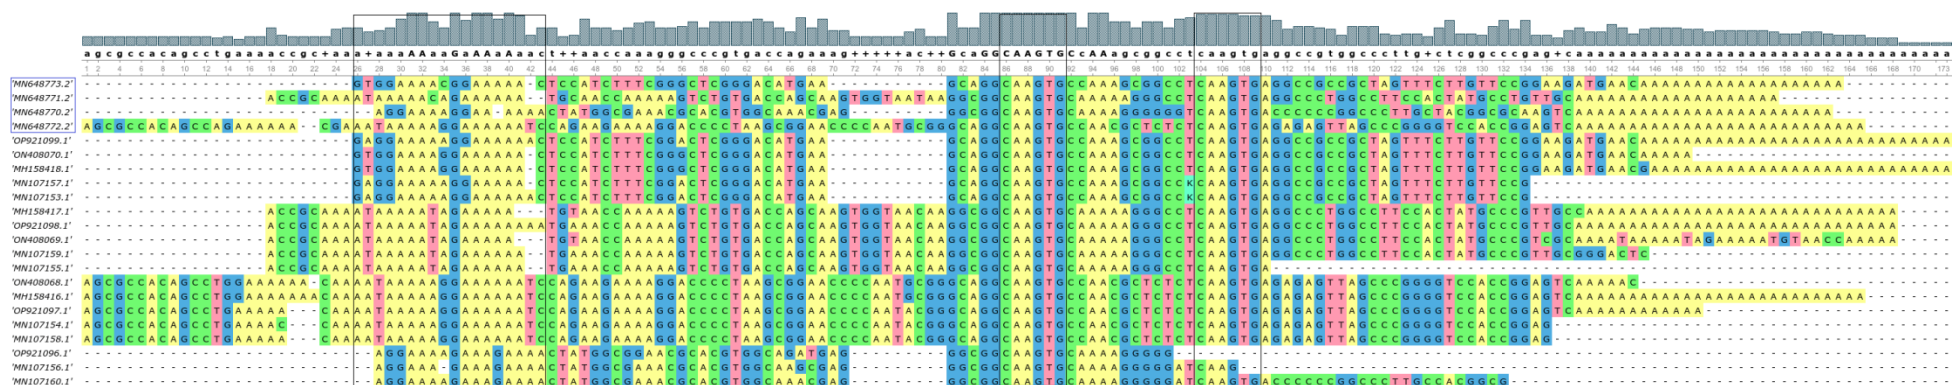

Figure S5. Conserved sequences in the 3'UTRs of ALSV genomes found in GenBank according to ClustalW alignment

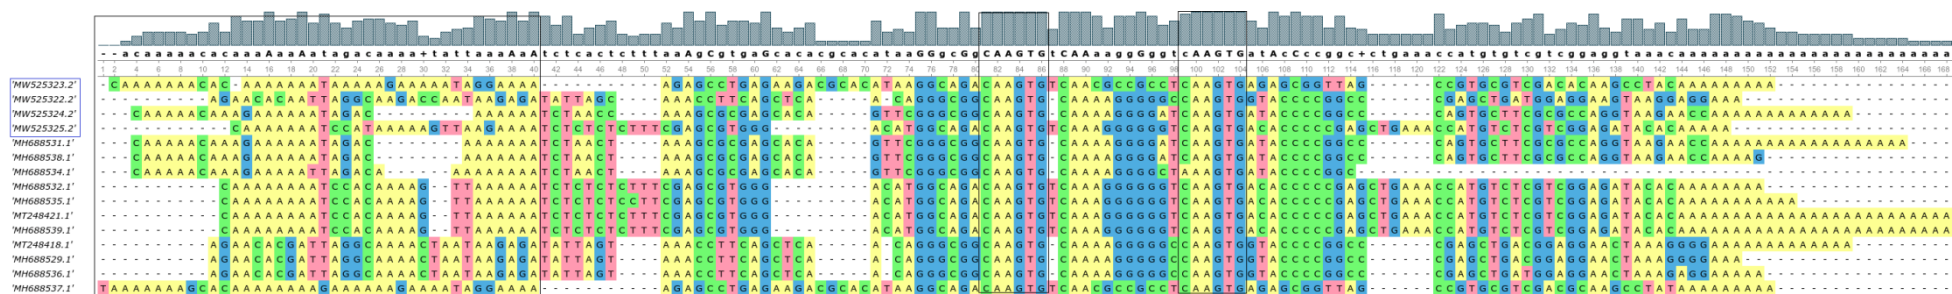

Figure S6. Conserved sequences in the 3'UTRs of YGTV genomes found in GenBank according to ClustalW alignment



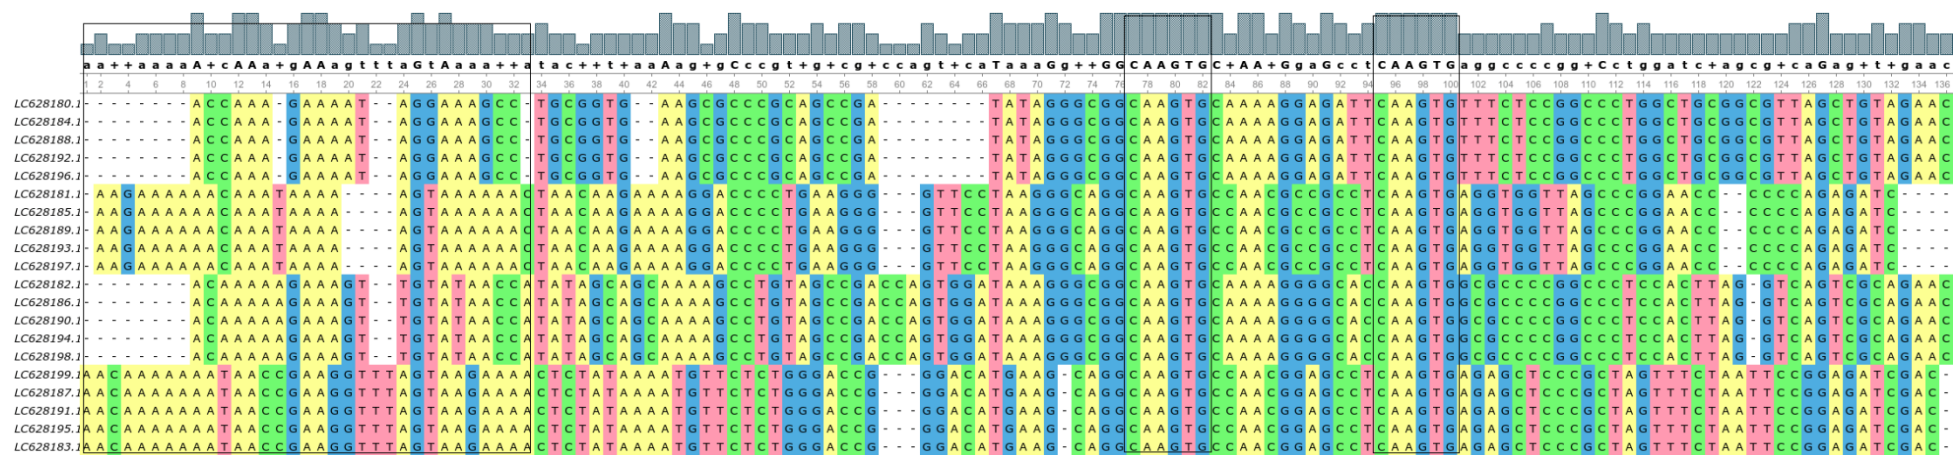

Figure S7. Conserved sequences in the 3'UTRs of Takachi virus genomes found in GenBank according to ClustalW alignment;
